# Supplementary material for: Direct evidence of Lowenstein's rule violation in swelling high-charge micas
Source: Royal Society of Chemistry journal article supplement (doi:10.1039/c4cc01632g), 2014-01-01
Supplement: c4cc01632g1.pdf [file c4cc01632g1.pdf]

## Direct evidence of Lowenstein's rule violation in swelling high-charge micas

E. Pavón, F. J. Osuna, M. D. Alba and L. Delevoye

### Experimental Section

#### *Synthesis*

For Na-*n*-mica, Na<sub>*n*</sub>[Si<sub>8-*n*</sub>Al<sub>*n*</sub>]Mg<sub>6</sub>O<sub>20</sub>F<sub>4</sub> (*n* = 2 or 4), synthesis, a procedure similar to that described by Alba et al.<sup>1</sup> was employed. Near-stoichiometric powder mixtures with the molar compositions (8 - *n*) SiO<sub>2</sub>, (*n*/2) Al<sub>2</sub>O<sub>3</sub>, 6 MgF<sub>2</sub>, and (2*n*) NaCl were used to synthesize Na-*n*-mica (*n* = 2 and 4). The starting materials were SiO<sub>2</sub> from Sigma (CAS no. 112945-52-5, 99.8% purity), Al(OH)<sub>3</sub> from Riedel-de Haën (CAS no. 21645-51-2, 99% purity), MgF<sub>2</sub> from Aldrich (CAS no. 20831-0, 98% purity), and NaCl from Panreac (CAS no. 131659, 99.5% purity). All reagents were mixed and ground vigorously before heating up to 900 °C in a Pt crucible for 15 h. After cooling, the solids were washed with deionized water and were dried at room temperature.

#### *NMR Experiments*

NMR spectra were acquired on a Bruker Avance III 18.8T spectrometer (<sup>1</sup>H, 800.13 MHz; <sup>17</sup>O, 108.48 MHz) using a 4mm HX Thalassée probehead. <sup>17</sup>O excitation was achieved by applying a central-transition selective  $\pi/2$  pulse of 9  $\mu$ s. The spinning frequency was 10 kHz, and the recycle delay was 1s. A total of 89216 and 56240 transients were added for Na-2-mica and Na-4-mica, respectively. Pulse sequences, such as double-frequency sweep (DFS) designed for signal enhancement of quadrupolar nuclei,<sup>2</sup> show large C<sub>Q</sub>-dependent efficiency. Therefore, they were not used to preserve quantitative information. Chemical shifts were given in ppm with respect to water.

**Suppl. Fig. 1.**  $^{29}\text{Si}$  MAS NMR spectra and integration of region A and B of the spectra

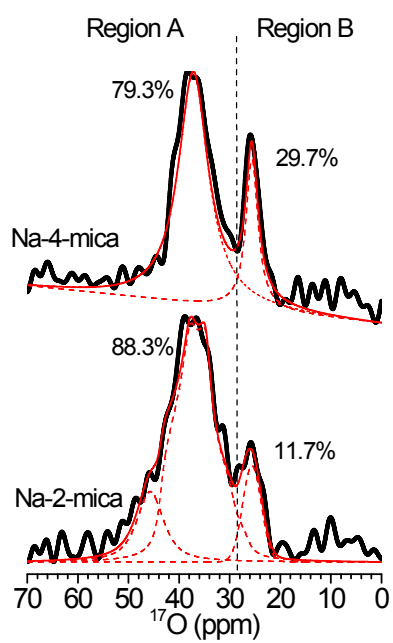

<sup>1</sup> M.D. Alba, M.A. Castro, M. Naranjo and E. Pavon, *Chemistry of Materials*, 2006, **18**, 2867.

<sup>2</sup> L. A. O'Dell, K. J. Harris, R. W. Schurko, *Journal of Magnetic Resonance*, 2010, **203**, 156.
